# Supplementary material
Source: PubMed Central journal article supplement (PMC5466846)

126 **Figure Legends**

127 **Fig 1. Characterization of the *JAK3* mutation.** (A) Pedigree. (B) Immunoblot of lysates  
128 from BLCLs derived from patients and controls (left). *JAK3* expression relative to controls (right).  
129 \*\*\* $p < 0.001$ , ns=not significant (one-way ANOVA). (C) Percentage of pSTAT5<sup>+</sup> BLCLs after  
130 stimulation for 10 minutes with IL-2 or IL-15. \*\*\*\* $p < 0.0001$  (two-way ANOVA). (D) Sanger  
131 sequencing of c.2652C>T variant. (E) RT-PCR amplification of *JAK3* mRNA encompassing the  
132 patient mutation site. (F) Diagram of mRNA splice variants induced by mutation. For B and C n=2  
133 for controls, n=2 for patients; data pooled from 2 independent experiments. Columns/lines and bars  
134 represent means and SEM.

135

136 **Extended Figure Legends**

137

138 **Fig E1.** Rash on forearm and hand of Patient 2.

139

140 **Fig E2.** H&E staining of biopsy of a skin lesion from Patient 2 at 10x (A) and 20x (B)  
141 magnification, showing granulomatous infiltrate. Scale bars = 200  $\mu$ m.

142

143 **Fig E3:** Quantitative analysis of the TCR V $\beta$  repertoire of T lymphocytes from patient 2.  
144 PBMCs were labeled using the IOTest Beta Mark TCR V beta repertoire kit. Analysis of CD4<sup>+</sup> and  
145 CD8<sup>+</sup> T cells was performed by flow cytometry.

146

147 **Table E1. *In silico* splicing prediction scores for JAK3 c.2652C>T:pV884V**

|                                | WT allele | Mutant allele |
|--------------------------------|-----------|---------------|
|                                | C         | T             |
| 1. MaxEntScan score            | -5.24     | 2.51          |
| 2. Human Splicing Finder score | 39.6      | 66.67         |

148 1. MaxEntScan: [http://genes.mit.edu/burgelab/maxent/Xmaxentscan\\_scoreseq.html](http://genes.mit.edu/burgelab/maxent/Xmaxentscan_scoreseq.html)

149 Score range -20 to +20. A higher score indicates a greater potential for splice site. +3 is the  
150 threshold for a likely splice site.

151

152 2. Human Splicing Finder: <http://www.umd.be/HSF3/index.html>

153 Score range 0–100. A higher score indicates a greater potential for splice site. 65 is the threshold for  
154 a likely splice site. If the WT score is under the threshold and the score variation is above +10%, the  
155 mutation is likely to create a new splice site. In this case, the difference is +67%, supporting the  
156 presence of new donor splice site.

157

158 **Table E2. Summary of clinical history and treatment outcomes for Patient 1, Patient 2 and**  
 159 **their siblings.**

| <b>Family Member</b> | <b>Sex</b> | <b>Genotype</b>               | <b>Presenting History</b>                                                                                                                                    | <b>Treatment Outcome</b>                                                                                                                                                                                                                                                              |
|----------------------|------------|-------------------------------|--------------------------------------------------------------------------------------------------------------------------------------------------------------|---------------------------------------------------------------------------------------------------------------------------------------------------------------------------------------------------------------------------------------------------------------------------------------|
| Patient 1            | Female     | c.2652C>T homozygous          | T <sup>B</sup> <sup>+</sup> NK <sup>low</sup> SCID detected by flow cytometry immediately after birth given clinical history of Affected Sister (see below). | Underwent hematopoietic stem cell transplantation (HSCT) with a 9/10 HLA-A mismatched unrelated donor after myeloablative conditioning. Post transplant course was complicated by severe gut GVHD, which was well controlled by pulse dose steroids. She is currently alive and well. |
| Patient 2            | Male       | c.2652C>T homozygous          | Granulomatous skin disease starting at 2 years of age.                                                                                                       | Currently undergoing evaluation for HSCT. Continues to have no history of recurrent or opportunistic infections. He has been started on trimethoprim/sulfamethoxazole and IVIG.                                                                                                       |
| Healthy Brother      | Male       | c.2652C>T heterozygous        | No significant past medical history.                                                                                                                         | n/a                                                                                                                                                                                                                                                                                   |
| Affected Sister      | Female     | Presumed c.2652C>T homozygous | Hospitalized with pneumonia and disseminated BCG at 6 months of age.                                                                                         | Died at 19 months of age from complications of HSCT.                                                                                                                                                                                                                                  |

160

161 **Supplemental Methods:**

162 **Immunoblotting.** Cell lysates were immunoblotted using a mAb raised against the N-  
163 terminus of JAK3 (clone D7B12, Cell Signaling) or anti-actin (clone ACTN05 (C4), Abcam)  
164 followed by HRP-conjugated goat anti-rabbit antibody or goat anti-mouse antibody conjugated to  
165 horseradish peroxidase. Densitometry was performed using ImageJ (NIH). JAK3:actin ratios were  
166 calculated and normalized to the JAK3:actin ratios of control EBV lines from healthy donors.

167 **STAT5 Phosphorylation.** PBMCs from Patient 1, Patient 2 and two healthy controls were  
168 infected with EBV in the presence of cyclosporine A to generate BLCLs. BLCLs were stimulated  
169 with the indicated concentrations of human IL-2 (Peprotech) or IL-15 (Peprotech) for 10 min at  
170 37°C, before fixation using Lyse/Fix Phosflow buffer (BD Biosciences) and permeabilization using  
171 BD Phosflow™ Perm Buffer III according to the manufacturer's instructions. Cells were stained  
172 with anti-phospho-STAT5 (Y694-PE) (clone SRBCZX, eBiosciences) and analyzed using a  
173 LSRFortessa (BD Biosciences).

174 **Semi-quantitative RT-PCR.** Total RNA was prepared from PBMCs cells from Patient 1 or  
175 a healthy control using the RNeasy kit (Qiagen). cDNA synthesis and amplification were performed  
176 from total RNA using the Superscript III One Step RT-PCR System with Platinum Taq DNA  
177 polymerase. Primers used for *JAK3* were: forward primer 5'- GACTTTCAGCGGGAGATTCA-3'  
178 (exon 19), and reverse primer 5'- TACTCCATGC CCTTGCAGAT-3' (spans exon 19 and 20).

179

Figure E1

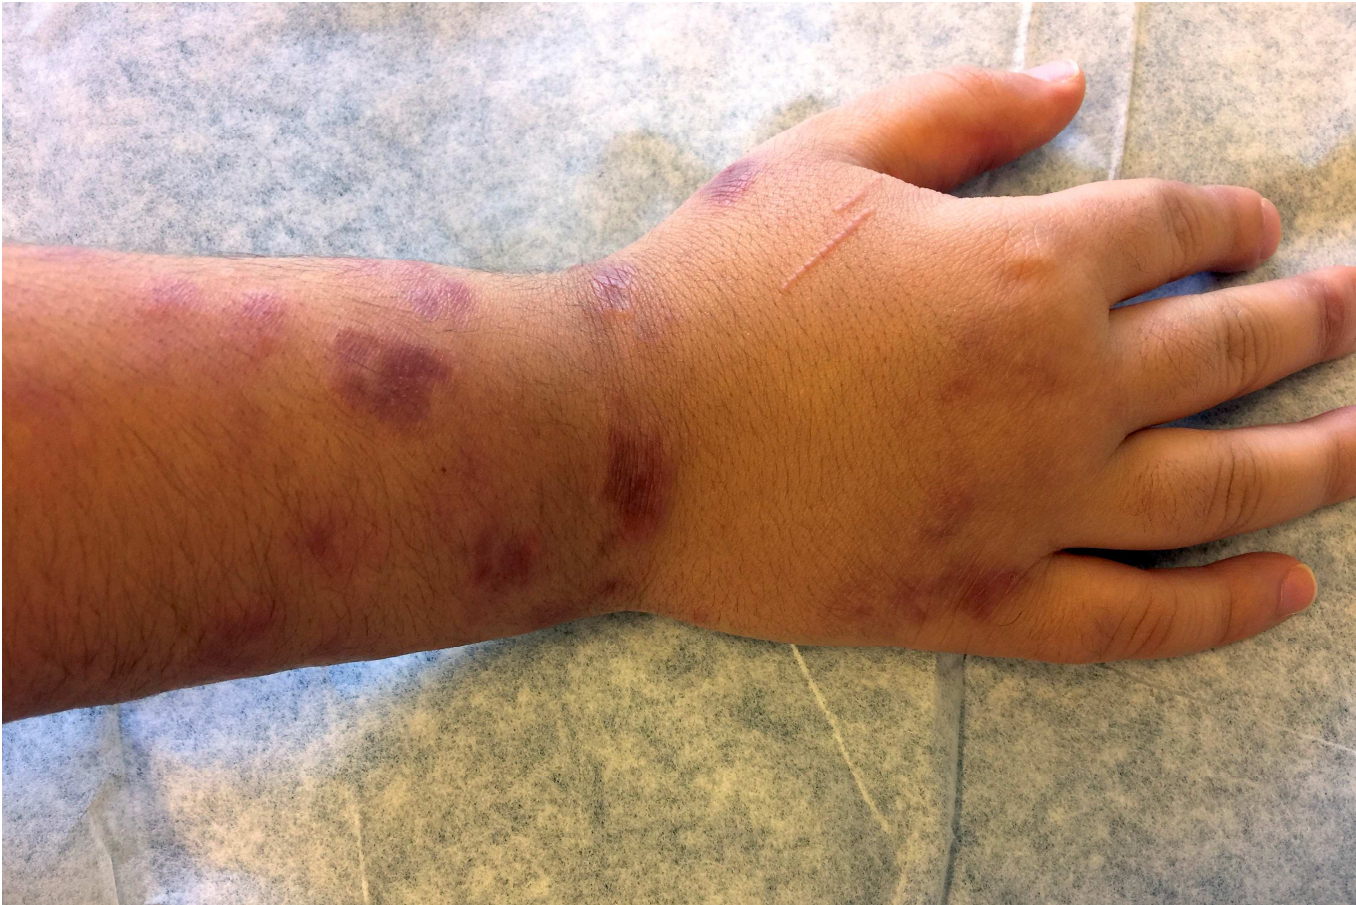

# Figure E2

A

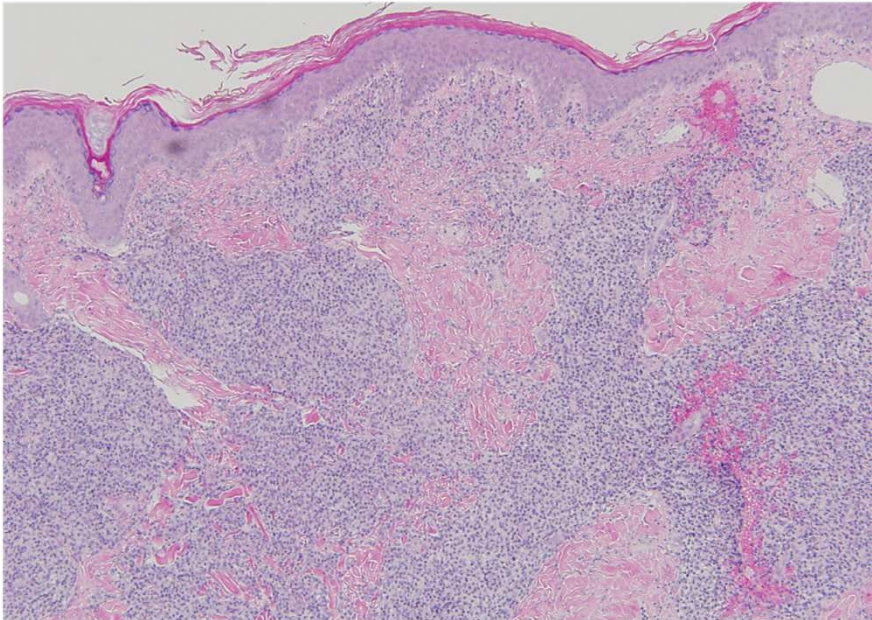

B

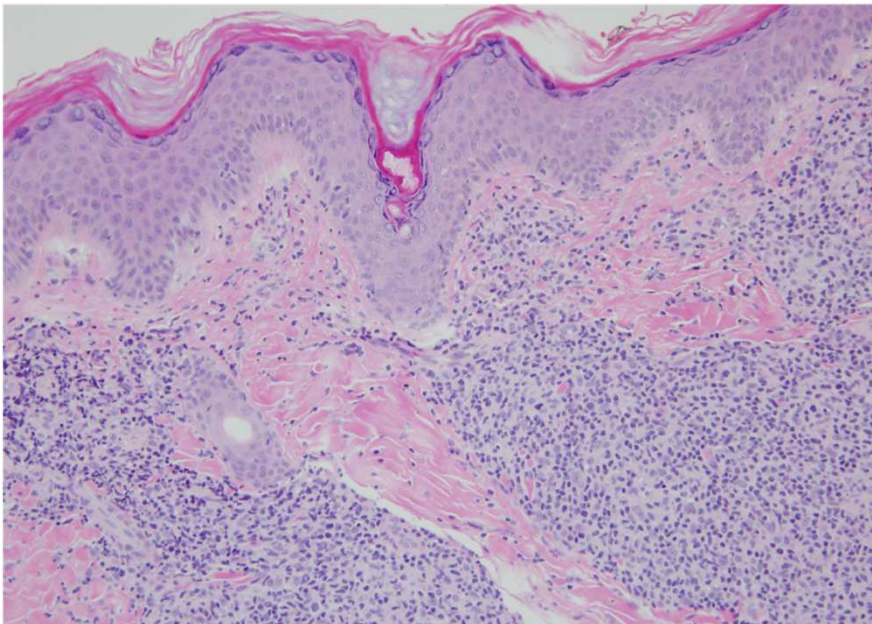

# Figure E3

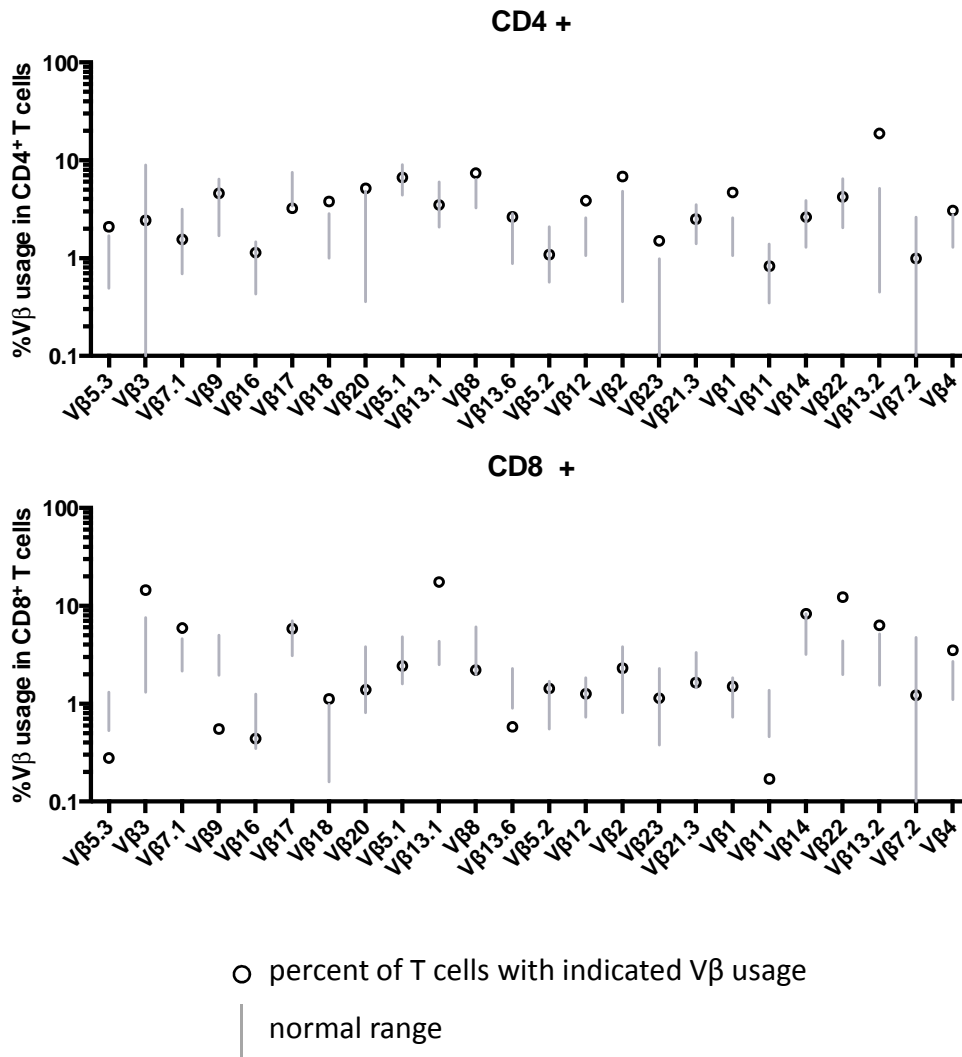

Supplement: NIHMS835619-supplement-supplement_1.pdf [file NIHMS835619-supplement-supplement_1.pdf]
